# Supplementary material for: Shotgun Metagenomic Profiling of Non-cpe Clostridium perfringens Reveals Mucinolytic and Cytolytic Genes in Pediatric Adenovirus Gastroenteritis
Source: Research Square preprint supplement (doi:10.21203/rs.3.rs-8633709/v1), 2026-02-04
Supplement: Supplementary file 2 [file ca6fe09a00367d8aa2d8ec69.docx]

**Table S1**: Shotgun Sequencing quality control and mapping metrics of sample SAM_A8

| Sample | Read Pair | No. of Reads (M) | Mean Read Length (bp) | Median Read Length (bp) | % Duplicates | % GC | Total Reads (M) | Reads Mapped (M) | % Mapped | Error Rate (%) |
| --- | --- | --- | --- | --- | --- | --- | --- | --- | --- | --- |
| SAM_A8 | R1 | 27.2 | 135 | 147 | 35.9 | 53.0 | 54.5 | 0.6 | 1.1 | 1.74 |
| SAM_A8 | R2 | 27.2 | 140 | 152 | 20.7 | 53.0 | 54.5 | 0.6 | 1.1 | 1.74 |
